# Supplementary material for: Papa Bem dos 3 aos 5 anos
Source: Atypon-hosted journal article supplement (doi:10.1176/appi.ajp.2012.169.3.340), 2012-09-01
Supplement: violence_influentialpubl.pdf [file violence_influentialpubl.pdf]

 


Psychiatry Online
